# Supplementary material for: Phase Variation of LPS and Capsule Is Responsible for Stochastic Biofilm Formation in Francisella tularensis
Source: PubMed Central journal article supplement (PMC8795689; doi:10.3389/fcimb.2021.808550), 2022-01-14

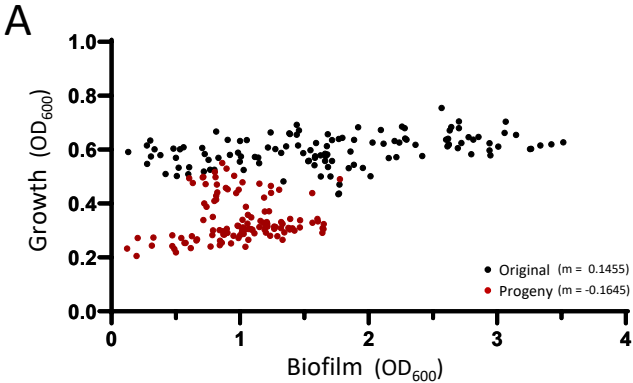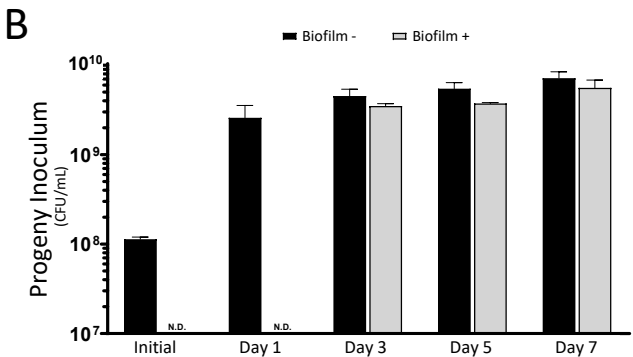

Supplement: DataSheet_1.pdf [file DataSheet_1.pdf]
