# Supplementary material for: Phase Variation of LPS and Capsule Is Responsible for Stochastic Biofilm Formation in Francisella tularensis
Source: PubMed Central journal article supplement (PMC8795689; doi:10.3389/fcimb.2021.808550), 2022-01-14
Supplement: DataSheet_6.pdf [file DataSheet_6.pdf]

**A**

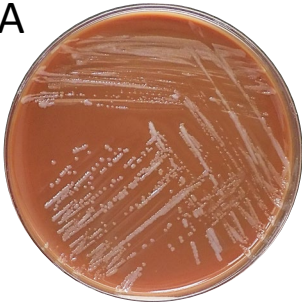

LVS wild-type

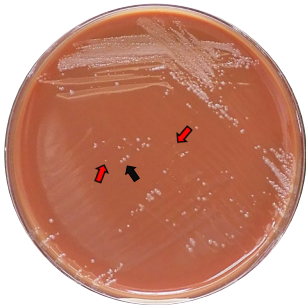

LVS Biofilm Positive  
Population 25
